# Supplementary material for: Golden Gate vectors for efficient gene fusion and gene deletion in diverse filamentous fungi
Source: PubMed Central journal article supplement (PMC8032637; doi:10.1007/s00294-020-01143-2), 2020-12-24
Supplement: 294_2020_1143_MOESM1_ESM.pdf [file 294_2020_1143_MOESM1_ESM.pdf]

## **Supplementary material**

### **Golden Gate vectors for efficient gene fusion and gene deletion in diverse filamentous fungi**

Current Genetics

Tim Dahlmann, Dominik Terfehr, Kordula Becker, Ines Teichert

Allgemeine und Molekulare Botanik, Ruhr-Universität Bochum, Universitätsstrasse 150,  
44801 Bochum, Germany

Corresponding author:

Ines Teichert

[ines.teichert@rub.de](mailto:ines.teichert@rub.de)

**Table S1** Fungal strains used in this study

| Strain                               | Description                                                                                                         | Reference                |
|--------------------------------------|---------------------------------------------------------------------------------------------------------------------|--------------------------|
| <i>P. chrysogenum</i>                |                                                                                                                     |                          |
| P2niaD18                             | <i>niaD</i> <sup>-</sup>                                                                                            | (Specht et al. 2014)     |
| Δku70FRT2                            | Δku70::FRT, <i>niaD</i> <sup>-</sup>                                                                                | (Kopke et al. 2010)      |
| ΔEN45-082340                         | Δku70::FRT, ΔEN45_082340::trpC(p)::nat1, <i>niaD</i> <sup>-</sup>                                                   | This study               |
| ΔEN45-100120                         | Δku70::FRT, ΔEN45_100120::trpC(p)::nat1, <i>niaD</i> <sup>-</sup>                                                   | This study               |
| mRFP-MAT1-1-1                        | <i>gpdA</i> (p)::mRFP::MAT1-1-1, trpC(p)::nat1, <i>niaD</i> <sup>-</sup>                                            | This study               |
| EGFP-MAT1-1-1                        | <i>gpdA</i> (p)::egfp::MAT1-1-1, trpC(p)::nat1, <i>niaD</i> <sup>-</sup>                                            | This study               |
| <i>S. macrospora</i>                 |                                                                                                                     |                          |
| wt                                   | Wild type; R19027                                                                                                   | FGSC #10222              |
| fus                                  | Reddish-brown ascospores; S70823                                                                                    | (Nowrousian et al. 2012) |
| Δidc3                                | S143456; Δidc3::trpC(p)::hph                                                                                        | This study               |
| Δku70                                | Δku70::trpC(p)::nat1                                                                                                | (Pöggeler and Kück 2006) |
| Δidc3::G-IDC3 (TKK24A-1)             | Δidc3 S143456 transformed with pGGN-G-IDC3; expresses GFP-IDC3; hph <sup>r</sup> , nat <sup>f</sup>                 | This study               |
| Δidc3::R-IDC3 (TIT71C-2)             | Δidc3 S143456 transformed with pGGN-R-IDC3; TIT71C-2; expresses mRFP-IDC3; hph <sup>r</sup> , nat <sup>f</sup>      | This study               |
| Δidc3::F-IDC3 (TIT2D-2)              | Δidc3 S143456 transformed with pGGN-F-IDC3; expresses FLAG-IDC3; hph <sup>r</sup> , nat <sup>f</sup>                | This study               |
| Δidc3::IDC3-G (TKK26C-1)             | Δidc3 S143456 transformed with pGGC-G-IDC3; expresses IDC3-GFP; hph <sup>r</sup> , nat <sup>f</sup>                 | This study               |
| Δidc3::IDC3-R (TKK27D-1)             | Δidc3 S143456 transformed with pGGC-R-IDC3; expresses IDC3-mRFP; hph <sup>r</sup> , nat <sup>f</sup>                | This study               |
| Δidc3::IDC3-F (TIT6B-2)              | Δidc3 S143456 transformed with pGGC-F-IDC3; expresses IDC3-FLAG; hph <sup>r</sup> , nat <sup>f</sup>                | This study               |
| TIT26C-1S3                           | Primary Δtih transformant; Δtih_FLP; Δtih::trpC(p)::nat::Smxyl(p)::Pcflp; hph <sup>r</sup> , nat <sup>f</sup>       | This study               |
| IT1513<br>IT1515<br>IT1517<br>IT1535 | Ascospore isolates from cross of TIT26C-1S3 to wt Δtih; hph <sup>s</sup> , nat <sup>s</sup> , brown spores, fertile | This study               |
| TIT8B-1S1<br>TIT8B-1S2<br>TIT8B-1S3  | Ascospore isolates Δefd16::trpC(p)::hph                                                                             | This study               |

hph<sup>r</sup>, resistant to hygromycin B; nat<sup>f</sup>, resistant to nourseothricin

**Table S2** Plasmids used in this study

| <b>Plasmid</b>         | <b>Description</b>                                                                                                                                                 | <b>Reference</b>                       |
|------------------------|--------------------------------------------------------------------------------------------------------------------------------------------------------------------|----------------------------------------|
| pBluescriptIISK(+)     | Cloning vector; <i>bla</i>                                                                                                                                         | Stratagene                             |
| pDest-Amp              | Destination vector for Golden Gate cloning; <i>bla</i> ( <i>Bsamut</i> ), <i>lacZ</i> gene with two internal <i>BsaI</i> sites <i>BsaI</i> (4) and <i>BsaI</i> (7) | This study                             |
| pD-Phleo               | <i>trpC(p)::phleo</i>                                                                                                                                              | (Hoff et al. 2010a; Hoff et al. 2010b) |
| pDrive                 | PCR cloning vector; <i>bla</i> , <i>kan</i> , <i>lacZ</i> $\alpha$                                                                                                 | Qiagen                                 |
| pDrivehph              | <i>trpc(p)::hph</i> in pDrive; <i>bla</i> , <i>kan</i>                                                                                                             | (Nowrousian and Cebula 2005)           |
| pEHN1nat               | <i>gpd(p)::egfp::trpC(t); bla, nat1</i>                                                                                                                            | (Dreyer et al. 2007)                   |
| pEHN2                  | <i>gpd(p)::MCS::trpC(t); hph; tel</i>                                                                                                                              | (Pöggeler and Kück 2004)               |
| pEHN5                  | Derivative of pEHN2 without telomeric sequences<br><i>gpd(p)::MCS::trpC(t); hph</i>                                                                                | This study                             |
| pEHN8                  | Derivative of pEHN5 with new multiple cloning site                                                                                                                 | This study                             |
| pEHN8nat               | <i>gpd(p)::MCS::trpC(t); bla, nat1</i>                                                                                                                             | This study                             |
| pEHN8nat-GG            | pEHN8nat without <i>BsaI</i> sites                                                                                                                                 | This study                             |
| pFlip                  | flp/ <i>FRT</i> vector;<br><i>FRT::hph::trpC(p)::smxyl(p)::Pcflp::FRT, bla, kan</i>                                                                                | (Bloemendal et al. 2014)               |
| pFlip-mut2             | pFlip with two mutated <i>BsaI</i> recognition sites in the <i>Pcflp</i> gene                                                                                      | This study                             |
| pFlip-mut2_Bsa-Linker1 | pFlip-mut2 with one <i>BsaI</i> linker                                                                                                                             | This study                             |
| pGFP-MAT1              | <i>gpd(p)::egfp::Pcmat1-1-1::trpC(t); nat1</i>                                                                                                                     | (Becker et al. 2015)                   |
| pGGC-F                 | <i>gpd(p)::BsaI(1)::lacZ::BsaI(3)::linker::3xflag::trpC(t); bla, nat1</i>                                                                                          | This study                             |
| pGGC-F-IDC3            | <i>gpd(p)::idc3::linker::3xflag::trpC(t); bla, nat1</i>                                                                                                            | This study                             |
| pGGC-G                 | <i>gpd(p)::BsaI(1)::lacZ::BsaI(3)::linker::egfp::trpC(t); bla, nat1</i>                                                                                            | This study                             |
| pGGC-G-IDC3            | <i>gpd(p)::idc3::linker::egfp::trpC(t); bla, nat1</i>                                                                                                              | This study                             |
| pGGC-R                 | <i>gpd(p)::BsaI(1)::lacZ::BsaI(3)::linker::mRFP::trpC(t); bla, nat1</i>                                                                                            | This study                             |
| pGGC-R-IDC3            | <i>gpd(p)::idc3::linker::mRFP::trpC(t); bla, nat1</i>                                                                                                              | This study                             |
| pGG-Flip-hph           | <i>BsaI(5)::Pcflp::(Smxyl(p)::trpC(p)::hph::BsaI(6)); bla</i>                                                                                                      | This study                             |
| pGG-Flip-nat1          | <i>BsaI(5)::Pcflp::(Smxyl(p)::trpC(p)::nat1::BsaI(6)); bla</i>                                                                                                     | This study                             |
| pGG-hph                | <i>BsaI(6)::trpC(p)::hph::BsaI(5)</i> in pDrive; <i>bla, kan</i>                                                                                                   | This study                             |
| pGG-nat1               | <i>BsaI(5)::trpC(p)::nat1::BsaI(6)</i> in pJet1.2; <i>bla</i>                                                                                                      | This study                             |
| pGGN-F                 | <i>gpd(p)::3xflag::linker::BsaI(1)::lacZ::BsaI(2)::trpC(t); bla, nat1</i>                                                                                          | This study                             |
| pGGN-F-IDC3            | <i>gpd(p)::3xflag::linker::idc3::trpC(t); bla, nat1</i>                                                                                                            | This study                             |

| <b>Plasmid</b>   | <b>Description</b>                                                                                                                                                                                                                                 | <b>Reference</b>           |
|------------------|----------------------------------------------------------------------------------------------------------------------------------------------------------------------------------------------------------------------------------------------------|----------------------------|
| pGGN-G           | <i>gpd(p)::egfp::linker::BsaI(1)::lacZ::BsaI(2)::trpC(t); bla, nat1</i>                                                                                                                                                                            | This study                 |
| pGGN-G-IDC3      | <i>gpd(p)::egfp::linker::idc3::trpC(t); bla, nat1</i>                                                                                                                                                                                              | This study                 |
| pGGN-G-Pcmat1    | <i>gpd(p)::egfp::linker::Pcmat1-1-1::trpC(t); bla, nat1</i>                                                                                                                                                                                        | This study                 |
| pGGN-R           | <i>gpd(p)::mRFP::linker::BsaI(1)::lacZ::BsaI(2)::trpC(t); bla, nat1</i>                                                                                                                                                                            | This study                 |
| pGGN-R-IDC3      | <i>gpd(p)::mRFP::linker::idc3::trpC(t); bla, nat1</i>                                                                                                                                                                                              | This study                 |
| pGGN-R-Pcmat1    | <i>gpd(p)::mRFP::linker::Pcmat1-1-1::trpC(t); bla, nat1</i>                                                                                                                                                                                        | This study                 |
| pGG-phleo        | <i>BsaI(5)::trpC(p)::phleo::BsaI(6)</i> in pDrive; <i>bla, kan</i>                                                                                                                                                                                 | This study                 |
| pIG1783-1        | <i>gpd(p)::egfp::trpC(t); bla, hph</i>                                                                                                                                                                                                             | (Pöggeler et al. 2003)     |
| pJet1.2          | PCR cloning vector; <i>bla</i>                                                                                                                                                                                                                     | Thermo Fisher Scientific   |
| pKO-082340       | Deletion vector for <i>P. chrysogenum</i> EN45_082340                                                                                                                                                                                              | This study                 |
| pKO-100120       | Deletion vector for <i>P. chrysogenum</i> EN45_100120                                                                                                                                                                                              | This study                 |
| pKO-efd16        | Deletion vector for <i>S. macrospora</i> <i>efd16</i> ; <i>bla, hph</i>                                                                                                                                                                            | This study                 |
| pKO-idc3         | Deletion vector for <i>S. macrospora</i> <i>idc3</i> ; <i>bla, hph, ura3</i>                                                                                                                                                                       | This study                 |
| pKO-tih          | Deletion vector for <i>S. macrospora</i> <i>tih</i> ; <i>bla, nat1</i> ; based on pGG-Flip-nat1 enabling marker recycling                                                                                                                          | This study                 |
| pMSH             | <i>gpd(p)::mRFP1(Sm)Q66T::trpC(t); nat1</i><br><i>mRFP1</i> codon-optimized for <i>S. macrospora</i> encoding Q66T variant amplified with RFP3 (aaccatggcctcctccgaggacgt) and RFP4 (ttgcggcccgttaggcgccggtggagtg) cloned <i>NcoI-NotI</i> in pEHN8 | (Engh et al. 2010)         |
| pMSHnat          | <i>gpd(p)::mRFP1(Sm)Q66T::trpC(t); nat1</i><br><i>mRFP1</i> codon-optimized for <i>S. macrospora</i> encoding Q66T variant                                                                                                                         | This study                 |
| pRHN1nat         | <i>gpd(p)::DsRed::trpC(t); nat1</i><br>based on pRHN1 (Janus et al. 2007), but with <i>nat1</i> instead of <i>hph</i>                                                                                                                              | Hoff and Kück, unpublished |
| pRS426           | Target vector for yeast recombination; <i>ura3, bla</i>                                                                                                                                                                                            | (Christianson et al. 1992) |
| pRS-Kassette     | <i>ura3(p)::URA, smxyl(p)::Pcflp, trpC(p)::hph</i>                                                                                                                                                                                                 | (Bloemendal et al. 2014)   |
| pRS-nat-Kassette | Derivative of pRS-Kassette, contains <i>nat1</i> instead of <i>hph</i> gene<br><i>ura3(p)::URA, smxyl(p)::Pcflp, trpC(p)::nat1</i>                                                                                                                 | This study                 |

**Table S3** Oligonucleotides used for cloning and verification of deletion strains

| Oligonucleotide     | Sequence (5'-3') <sup>a</sup>                                                                                        |
|---------------------|----------------------------------------------------------------------------------------------------------------------|
| 082340-3fw          | GTACGGTCTCGGTCAGCATTTC AAGTGATGGTCCC                                                                                 |
| 082340-3rv          | CTCAGGTCTCCCGTAAACACTGCCGTC ACTGGAAC                                                                                 |
| 082340-5fw          | GACTGGTCTCAAGTCCAATCTCTATGTCCACACCG                                                                                  |
| 082340-5rv          | CAGAGGTCTCAGCAGTCGAAGAGAGACAGTAAGTG                                                                                  |
| 100120-3fw          | GTACGGTCTCGGTCAGTTTATCTAGTTTGCGAGCTCC                                                                                |
| 100120-3rv          | CTCAGGTCTCCCGTAGAAAGAGCACCGTCGGCAAC                                                                                  |
| 100120-5fw          | GACTGGTCTCAAGTCTTAGGTA AATCGGCCGTTTCG                                                                                |
| 100120-5rv          | CAGAGGTCTCAGCAGAGAGGAATATGGTTGTAGGGAC                                                                                |
| 214-3fw             | <i>gcccaaaaatgctccttcaatatcagttgc</i> GTACGGGTGCCGC<br>TGTGTGTGGTTG                                                  |
| 214-3rv             | <i>gcggataacaatttcacacaggaaacagc</i> <b>GGATCC</b> TTACGGGC<br>ATTACCTGGGATGCGTG                                     |
| 214-5fw             | <i>gtaacgccagggttttcccagtcacgacg</i> <b>GGATCC</b> TTTCTTC<br>GCCGTCAAGGCCCGGC                                       |
| 214-5rv             | <i>cgagggcaaaggaatagggttccggtgagg</i> TTTGGATGTGTGT<br>TGATGTGTTGTG                                                  |
| 214-vp1             | CTGATGCACTTTGCCCTTGG                                                                                                 |
| 214-vp2             | CTGCTTACTTCAAGGGCAAG                                                                                                 |
| 214-vp3             | CTTTCCATACGCTAGATCGG                                                                                                 |
| 2986-3fw            | CCCATAGGTCTCGGTCATCAAGGTCCAAAGTTATGTCT                                                                               |
| 2986-3rv            | CCCATAGGTCTCGGATATTTTTTTTTCAGTCTTTTCTCCTTTTC                                                                         |
| 2986-5fw            | CCCATAGGTCTCCAGTCGAGTAATCTTACCAA ACTGGC                                                                              |
| 2986-5rv            | CCCATAGGTCTCCGCAGGATGAAACTTGTGTGATTTAAACA                                                                            |
| 2986-vp1            | TGCCAGGATTAGCTGTAGTC                                                                                                 |
| 2986-vp2            | TTTGGAGACCATCTGGGAGG                                                                                                 |
| 2986-vp3            | TGGCTGTTGGTGATCCTTGG                                                                                                 |
| 5650-vp1            | CCTCTAGGTATCTCTCAAGG                                                                                                 |
| 5650-vp2            | CATACATTGAGACGGCAACG                                                                                                 |
| 5650-vp3            | GAGGGTGTGATGAGTATGC                                                                                                  |
| BsaI-delete-fw      | TTACTTGGCCATCGGTCTCC                                                                                                 |
| BsaI-delete-rv      | CCCATAGGTCTCCAGGTGTAGACCGATGGCCAAGTAAATG                                                                             |
| Bsa-L1-fw           | CGATT <b>TACGT</b> AGGTCTCCTGACCTGCAGAACC                                                                            |
| Bsa-L1-rv           | GGTT <b>CTGCAG</b> GTTCAGGAGACCTACGTAATCG                                                                            |
| Bsa-L2-fw           | CCTG <b>AAGCTT</b> GCAGTGAGACCAGATCTACCG                                                                             |
| Bsa-L2-rv           | CGGT <b>AGATCT</b> GGTCTCACTGCAAGCTTCAGG                                                                             |
| ClaI_PlacZ_f        | CTG <b>ATCGAT</b> CGACAGGTTTCCCGACTGGA                                                                               |
| EGFP_GS_BsaI_ClaI_r | TCG <b>ATCGAT</b> GGTCTCGACCAGAGCCAGAACCCTTGTACAGCTC<br>GTCCATGC                                                     |
| FLAG-for1           | <b>CTAGT</b> GGTCTCAGGATCTGGCTCTGGTATGGACTACAAAGACC<br>ATGACGGTGATTATAAAGATCATGATATCGACTACAAGGATGA<br>CGATGACAAGTGAG |

| <b>Oligonucleotide</b> | <b>Sequence (5'-3')<sup>a</sup></b>                                                                                          |
|------------------------|------------------------------------------------------------------------------------------------------------------------------|
| FLAG-for3              | <b>CTAGCATGGACTACAAAGACCATGACGGTGATTATAAAGATCA</b><br>TGATATCGACTACAAGGATGACGATGACAAGGGTTCTGGCTCT<br><b>GGTCGAGACCAT</b>     |
| FLAG-rev1              | <b>GATCCTCACTTGTTCATCGTCATCCTTGTAGTCGATATCATGAT</b><br>CTTTATAATCACCGTCATGGTCTTTGTAGTCCATAACCAGAGCC<br><b>AGATCCTGAGACCA</b> |
| FLAG-rev3              | <b>CGATGGTCTCGACCAGAGCCAGAACCCTTGTTCATCGTCATCCT</b><br>TGTAGTCGATATCATGATCTTTATAATCACCGTCATGGTCTTT<br><b>GTAGTCCATG</b>      |
| GG_Int1                | <b>AGGAATT</b> CGAAGTCGGAGACCTGACGGTCTCATAACGTACGAAT<br>TCGC                                                                 |
| GG_Int2                | <b>GCGAATT</b> CGTACGTATGAGACCGTCAGGTCTCCGACTTCGAAT<br>TCCT                                                                  |
| GG_phleo_fw            | GTATGGTCTCACTGCACAACCTGATATTGAAGGAGCATTTTTTTG<br>G                                                                           |
| GG_phleo_rv            | CACTGGTCTCCTGACTTCATGAGATGCCTGCAAGCAAT                                                                                       |
| GG-1                   | <b>ACTAGTGGTCTCAGGTTCTGGCTCTGGTATGGTGAGCAAGGGC</b><br>GAGG                                                                   |
| GG-2                   | <b>GGATCC</b> CCGCTTTACTTGTACAGCTCGTCC                                                                                       |
| GG-3neu                | <b>ATCGATCTGGTCGAGACCCGACAGGTTTCCCGACTGG</b>                                                                                 |
| GG-4                   | <b>ACTAGT</b> TTACAATTTCCATTCGCCATTTCAGGC                                                                                    |
| GG-C-mRFP-fw           | <b>ACTAGTGGTCTCAGGATCTGGCTCTGGTATGGCCTCCTCCGAG</b><br>GACG                                                                   |
| GG-C-mRFP-rv           | <b>GGATCC</b> CCGCTTTAGGCGCCGGTGGAGTGG                                                                                       |
| GG-KO-hph-fw           | CACTGGTCTCACTGCCCTCAACGGAACCCTATTCC                                                                                          |
| GG-KO-hph-rv           | ACGTGGTCTCATGACGCAACTGATATTGAAGGAGC                                                                                          |
| GG-nat1-fw             | GTATGGTCTCACTGCACGAATTCAACTGATATTGAAGGAGC                                                                                    |
| GG-nat1-rv             | CACTGGTCTCCTGACTTCAGGGGCAGGGCATGCTC                                                                                          |
| GG-N-mRFP-fw           | <b>GCTAG</b> CATGGCCTCCTCCGAGGACG                                                                                            |
| GG-N-mRFP-rv           | <b>ATCGATGGTCTCGACCAGAGCCAGAACC</b> GGCGCCGGTGGAGTG<br>GCG                                                                   |
| GGN-PcMAT1-rev         | GGGACATGGTCTCCTACGCTAGTTGTGCCCAAAGATCC                                                                                       |
| GG-PcMAT1-for          | GGGACATGGTCTCCTGGTATGTCTACCTCTCTTGATGC                                                                                       |
| hph1MN                 | CGATGGCTGTGTAGAAGTACTCGC                                                                                                     |
| hph2MN                 | ATCCGCCCTGGACGACTAAACCAA                                                                                                     |
| KO-082340-5fw          | TGGTTCTCATAACCCGCTCTG                                                                                                        |
| KO-100120-3rw          | ACATATCTGGATCGTGACCGG                                                                                                        |
| L-01                   | <b>GCGGCCGC</b> ATAGATCTCAGGTACCTGGAATTCGAGCTAGCTAC<br>CGCGGCAATCGATCG <b>ACTAGT</b>                                         |
| L-02                   | <b>ACTAGT</b> CGATCGATTGCCGCGGTAGCTAGCTCGAATTCAGGT<br>ACCTGAGATCTAT <b>GCGGCCGC</b>                                          |
| LacZ_BsaI_SpeI_r       | TCG <b>ACTAGT</b> TACGTGAGACCTTACAATTTCCATTCGCC                                                                              |
| Mut_pehn8nat_1         | CGGTCGTCAAGG <b>GACCT</b> ACGAGACTG                                                                                          |

| Oligonucleotide | Sequence (5'-3') <sup>a</sup>                                     |
|-----------------|-------------------------------------------------------------------|
| Mut_pehn8nat_2  | TTGATCTGCTTGATCTCGTCTCCC                                          |
| Mut_pehn8nat_3  | GGCGAGCTCTGTACAGT                                                 |
| Mut_pehn8nat_4  | GGTTTAGGGTTAGGGCCC                                                |
| nat1-fw         | GGCGCTCTACATGAGCATG                                               |
| nat-Kass-fw     | <i>tacctattctacc</i> <b>caagcatccaa</b> ATGGCCACCCTCGACGACA<br>C  |
| nat-Kass-rv     | <i>caactggttccc</i> <b>ggtcggcatctact</b> TCAGGGGCAGGGCATGC<br>TC |
| NheI_EGFP_f     | CTGG <b>CTAGC</b> ATGGTGAGCAAGGGCGAGGA                            |
| pcflp_mut1_fw   | TCGTCACCGAaACCAAGACCT                                             |
| pcflp_mut1_rv   | GGCACTGGATAATGACGC                                                |
| pcflp_mut2_fw   | TCAAGGACGAaACCAATCCCA                                             |
| pcflp_mut2_rv   | GGCGATCATTTCCTTGG                                                 |
| PtpC-rw         | CTCCACTAGCTCCAGCCAAG                                              |
| SM#848          | TGATACCGCG <u>g</u> <u>GACCC</u> CACGC                            |
| SM#849          | TTGCAGCACTGGGGCCAG                                                |
| tih-KO-3fw      | GGGAAAGGTCTCCGCAGGAGAGTGAGTCAGACACTG                              |
| tih-KO-3rv      | GGGAAAGGTCTCC <u>CGTACATATG</u> GCTGACAACCTTGGTCTG                |
| tih-KO-5fw      | GGGAAAGGTCTCGAGT <b>CCATATG</b> CTGCCAAATTCACATGGG                |
| tih-KO-5rv      | GGGAAAGGTCTCGGTCAACCATATACCTGCCGGCT                               |

<sup>a</sup> Restriction sites for cloning are indicated in bold letters, *BsaI* sites are underlined, *BsaI* sites with mutations are doubly underlined, *BsaI*-generated overhangs are indicated in italics, and mutated bases are indicated in lowercase letters. Overlaps for homologous recombination in yeast are shown in lowercase italics. Note that FLAG oligonucleotides were designed such that annealing already provided compatible ends.

**Table S4** Golden Gate protocols

|                         |                                 | I<br>Standard | II<br>Deletion<br>vectors | III<br>Internal <i>BsaI</i><br>sites    |
|-------------------------|---------------------------------|---------------|---------------------------|-----------------------------------------|
| Initial restriction     | 37 °C                           | 30 min        | 90 min                    | 30-90 min,<br>depending on<br>construct |
| Restriction/ligation    | 2 min 37 °C<br>+<br>5 min 16 °C | 50 cycles     | 50 cycles                 | 50 cycles                               |
| Terminal<br>restriction | 37 °C                           | 5 min         | 5 min                     | -                                       |
|                         | 55 °C                           | 5 min         | 5 min                     | -                                       |
| Heat inactivation       | 80 °C                           | 5 min         | 5 min                     | 5 min                                   |
| Storage                 | 11 °C                           | ∞             | ∞                         | ∞                                       |



**Table S5** Oligonucleotides for generating and sequencing Golden Gate plasmids as well as generating split marker deletion cassettes. See table S6 for correlation of oligonucleotides and plasmids.

| Oligonucleotide                                                        | Sequence (5'-3') <sup>a</sup>          | Specificity                                                                            |
|------------------------------------------------------------------------|----------------------------------------|----------------------------------------------------------------------------------------|
| <b>Oligonucleotides for amplification of GOIs and flanking regions</b> |                                        |                                                                                        |
| GG-C/N-fw                                                              | CGAGTCAGGTCTCCTGGTN <sub>[17-23]</sub> | Forward primer for amplification of GOI for gene fusion<br><i>BsaI</i> (1) site        |
| GG-N-rv                                                                | CGAGTCAGGTCTCCTACGN <sub>[17-23]</sub> | Reverse primer for amplification of GOI for N-terminal tagging<br><i>BsaI</i> (2) site |
| GG-C-rv                                                                | ACCGACAGGTCTCGATCCN <sub>[17-23]</sub> | Reverse primer for amplification of GOI for C-terminal tagging<br><i>BsaI</i> (3) site |
| GG-5fw                                                                 | ACGACTGGTCTCAAGTCN <sub>[17-23]</sub>  | Forward primer for amplification of 5' flanking region<br><i>BsaI</i> (4) site         |
| GG-5rv                                                                 | ATCAGAGGTCTCAGCAGN <sub>[17-23]</sub>  | Reverse primer for amplification of 5' flanking region<br><i>BsaI</i> (5) site         |
| GG-3fw                                                                 | TCGTACGGTCTCGGTCCAN <sub>[17-23]</sub> | Forward primer for amplification of 3' flanking region<br><i>BsaI</i> (6) site         |
| GG-3rv                                                                 | ATCTCAGGTCTCCCGTAN <sub>[17-23]</sub>  | Reverse primer for amplification of 3' flanking region<br><i>BsaI</i> (7) site         |
| <b>Oligonucleotides for sequencing of Golden Gate plasmids</b>         |                                        |                                                                                        |
| 1751                                                                   | GCCATATTTTCCTGCTCTCC                   | <i>gpd</i> (p) forward                                                                 |
| 1757                                                                   | AGCTGACATCGACACCAACG                   | <i>trpC</i> (t) reverse                                                                |
| egfp-fw                                                                | GGTGAACCTCAAGATCCG                     | <i>egfp</i> , forward                                                                  |
| egfp-rv                                                                | ACTTGTGGCCGTTTACGTCG                   | <i>egfp</i> , rv reverse                                                               |
| mRFP-fw                                                                | CTACAAGACCGACATCAAGC                   | <i>mRFP</i> , forward                                                                  |
| mRFP-rv                                                                | GAACTCGTGGCCGTTGACGGAGCC               | <i>mRFP</i> , reverse                                                                  |
| 426-15                                                                 | TTGTGTGGAATTGTGAGCGG                   | pDest-Amp, sequences reverse into 3'-flanking region of deletion vectors               |
| 426-14                                                                 | TTAAGTTGGGTAACGCCAGG                   | pDest-Amp, sequences forward into 5'-flanking region of deletion vectors               |
| flp-for                                                                | TCCCTGACCACTACTTCG                     | <i>Pcflp</i> gene, forward; sequences reverse into 5'-                                 |

|                                              |                         |                                                                                                                                                                         |
|----------------------------------------------|-------------------------|-------------------------------------------------------------------------------------------------------------------------------------------------------------------------|
|                                              |                         | flanking region (pGG-Flip-nat1, pGG-Flip-hph)                                                                                                                           |
| hph1IT                                       | GGCTGTGTAGAAGTACTCGC    | <i>hph</i> gene, forward; sequences reverse into 5'-flanking region (pGG-hph) or forward into 3'-flanking region (pGG-Flip-hph)                                         |
| hph2IT                                       | ATCCGCCTGGACGACTAAAC    | <i>trpC</i> (p), reverse; sequences forward into 3'-flanking region (pGG-hph) or reverse into 5'-flanking region (pGG-nat1, pGG-phleo)                                  |
| nat1-seq                                     | GGCGCTCTACATGAGCATG     | <i>nat1</i> , forward; sequences forward into 3'-flanking region (pGG-nat1, pGG-Flip-nat1)                                                                              |
| phleo-seq                                    | CATCCAGGAAACCAGCAGCG    | <i>phleo</i> , forward; sequences forward into 3'-flanking region (pGG-phleo)                                                                                           |
| <b>Oligonucleotides for split marker PCR</b> |                         |                                                                                                                                                                         |
| hph_split_5'_rv                              | CGTTGCAAGACCTGCCTGAAACC | <i>hph</i> forward; use with GG-5fw to amplify 5' split fragment (if cassette from pGG-hph) or with GG-3rv to amplify 3' split fragment (if cassette from pGG-Flip-hph) |
| hph_split_3'_fw                              | TTGGCGACCTCGTATTGGGAATC | <i>hph</i> reverse; use with GG-3rv to amplify 3' split fragment (if cassette from pGG-hph) or with GG-5fw to amplify 5' split fragment (if cassette from pGG-Flip-hph) |
| nat-split-fw_new                             | TGCGTTGACGTTGGTGAC      | <i>nat1</i> reverse; use with GG-5fw to amplify 5' split fragment                                                                                                       |
| nat_split_rev_new                            | CACTGGATGGGTCCTTCAC     | <i>nat1</i> forward; use with GG-3rv to amplify 3' split fragment                                                                                                       |

<sup>a</sup> *Bsa*I sites are underlined and *Bsa*I overlaps are indicated in italics.

**Table S6** Overview of Golden Gate cloning protocols with vectors from this study

| <b>N-terminal fusion</b>                    |                                                                                                                                                                                                                                     |                                      |                                      |
|---------------------------------------------|-------------------------------------------------------------------------------------------------------------------------------------------------------------------------------------------------------------------------------------|--------------------------------------|--------------------------------------|
| Primers                                     | GG-C/N-fw / GG-N-rv                                                                                                                                                                                                                 |                                      |                                      |
| Amplified region                            | GOI, including start and stop codon                                                                                                                                                                                                 |                                      |                                      |
| Destination vector                          | pGGN-F                                                                                                                                                                                                                              | pGGN-G                               | pGGN-R                               |
| Golden Gate components <sup>a</sup>         | PCR, destination vector<br>Equimolar (40-80 fmol each)                                                                                                                                                                              |                                      |                                      |
| Golden Gate protocol                        | I                                                                                                                                                                                                                                   |                                      |                                      |
| Sequencing primers                          | 1751, 1757                                                                                                                                                                                                                          | egfp-fw, 1757                        | mRFP-fw, 1757                        |
| <b>C-terminal fusion</b>                    |                                                                                                                                                                                                                                     |                                      |                                      |
| Primers                                     | GG-C/N-fw / GG-C-rv                                                                                                                                                                                                                 |                                      |                                      |
| Amplified region                            | GOI, including start codon, excluding stop codon                                                                                                                                                                                    |                                      |                                      |
| Destination vector                          | pGGC-F                                                                                                                                                                                                                              | pGGC-G                               | pGGC-R                               |
| Golden Gate components <sup>a</sup>         | PCR, destination vector<br>Equimolar ratio (40-80 fmol each)                                                                                                                                                                        |                                      |                                      |
| Golden Gate protocol                        | I                                                                                                                                                                                                                                   |                                      |                                      |
| Sequencing primers                          | 1751, 1757                                                                                                                                                                                                                          | 1751, egfp-rv                        | 1751, mRFP-rv                        |
| <b>Deletion vector, standard</b>            |                                                                                                                                                                                                                                     |                                      |                                      |
| Primers                                     | GG-5fw / GG-5rv, GG-3fw / GG-3rv                                                                                                                                                                                                    |                                      |                                      |
| Amplified region                            | 1 kb each 5'- and 3'-flanking region bordering the genomic region to be deleted                                                                                                                                                     |                                      |                                      |
| Destination vector                          | pDest-Amp                                                                                                                                                                                                                           |                                      |                                      |
| Cassette donor vector                       | pGG-hph                                                                                                                                                                                                                             | pGG-nat1                             | pGG-phleo                            |
| Golden Gate components <sup>a</sup>         | 5'-PCR, 3'-PCR, destination vector, cassette donor vector<br>Molar ratio 2:2:2:1 (40-80 fmol each)                                                                                                                                  |                                      |                                      |
| Golden Gate protocol                        | II                                                                                                                                                                                                                                  |                                      |                                      |
| Sequencing primers                          | hph1IT, hph2IT,<br>426-14, 426-15                                                                                                                                                                                                   | nat1-seq, hph2IT,<br>426-14, 426-15  | phleo-seq, hph2IT,<br>426-14, 426-15 |
| <b>Deletion vector for marker recycling</b> |                                                                                                                                                                                                                                     |                                      |                                      |
| Primers                                     | GG-5fw / GG-5rv, GG-3fw / GG-3rv                                                                                                                                                                                                    |                                      |                                      |
| Amplified region                            | 1 kb each 5'- and 3'-flanking region bordering the genomic region to be deleted                                                                                                                                                     |                                      |                                      |
| Destination vector                          | pDest-Amp                                                                                                                                                                                                                           |                                      |                                      |
| Cassette donor vector                       | pGG-Flip-hph                                                                                                                                                                                                                        | pGG-Flip-nat1                        |                                      |
| Golden Gate components <sup>a</sup>         | 5'-PCR, 3'-PCR, destination vector, cassette donor vector<br>Molar ratio 2:2:2:1 (40-80 fmol each)                                                                                                                                  |                                      |                                      |
| Golden Gate protocol                        | II                                                                                                                                                                                                                                  |                                      |                                      |
| Sequencing primers                          | hph1_IT, flp-for,<br>426-14, 426-15                                                                                                                                                                                                 | nat1-seq, flp-for,<br>426-14, 426-15 |                                      |
| <b>Generation of deletion cassette</b>      |                                                                                                                                                                                                                                     |                                      |                                      |
| PCR                                         | GG-5fw / GG-3rv                                                                                                                                                                                                                     |                                      |                                      |
| Split marker PCR                            | pGG-hph:<br>GG-5fw / hph_split_5'_rv and hph_split_3'_fw / GG-3rv<br>pGG-Flip-hph:<br>GG-5fw / hph_split_3'-fw and hph_split_5'_rv / GG-3rv<br>pGG-nat1, pGG-Flip-nat1:<br>GG-5fw / nat-split-fw_new and nat_split_rev_new / GG-3rv |                                      |                                      |
| Restriction                                 | <i>HindIII</i> and <i>PstI</i> (if no recognition sites in flanking regions)                                                                                                                                                        |                                      |                                      |

<sup>a</sup> All Golden Gate reactions are carried out in a 0.5 ml PCR tube in a total volume of 15  $\mu$ l in 1x ligation buffer with 1  $\mu$ l T4 ligase and 1  $\mu$ l *BsaI* or *BsaIHFv2* (see Materials and Methods).

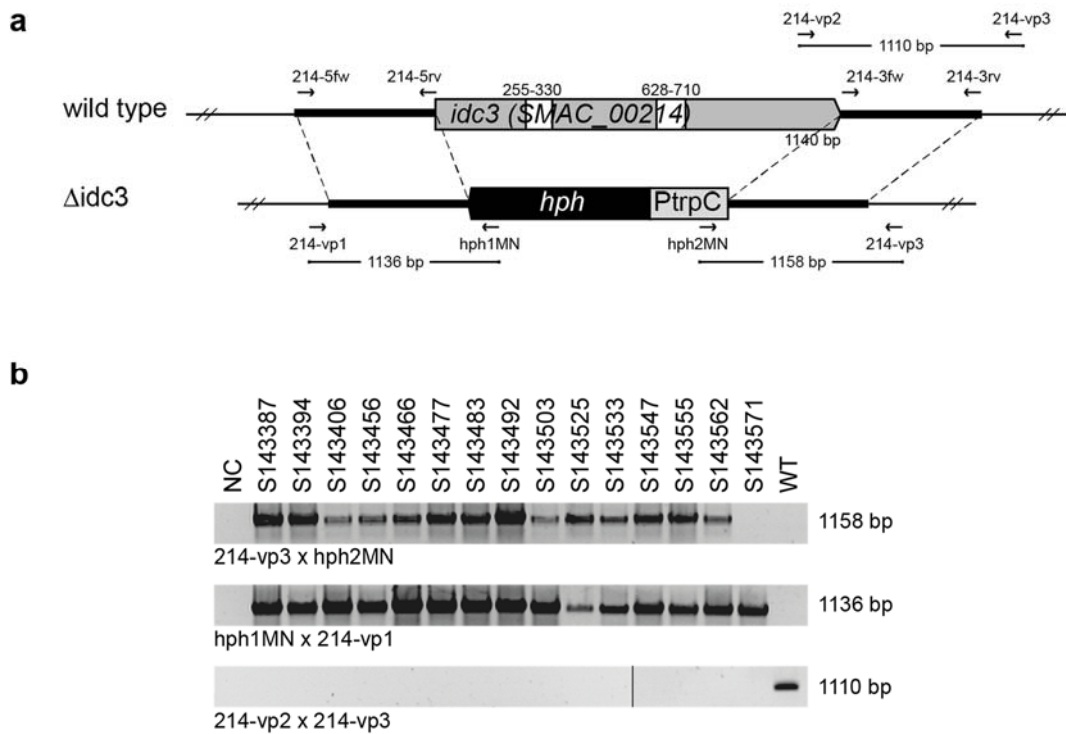

**Fig. S1** Generation of *SMAC\_00214* (*idc3*) deletion strains. **a** Schematic representation of the *idc3* (*SMAC\_00214*) genomic locus in wildtype and deletion strains ( $\Delta idc3$ ). ORFs are displayed as grey arrows, introns as white boxes. Flanking sequences used for homologous integration of deletion constructs are shown as thick black lines. Black arrows represent primers used for PCR; size of PCR products is given on the thin black lines depicting the PCR products. Not drawn to scale. **b** PCR analysis of  $\Delta idc3$  ascospore isolates with primers indicated in **a**. Strain S143456 was used in further analysis in this study. NC, negative control

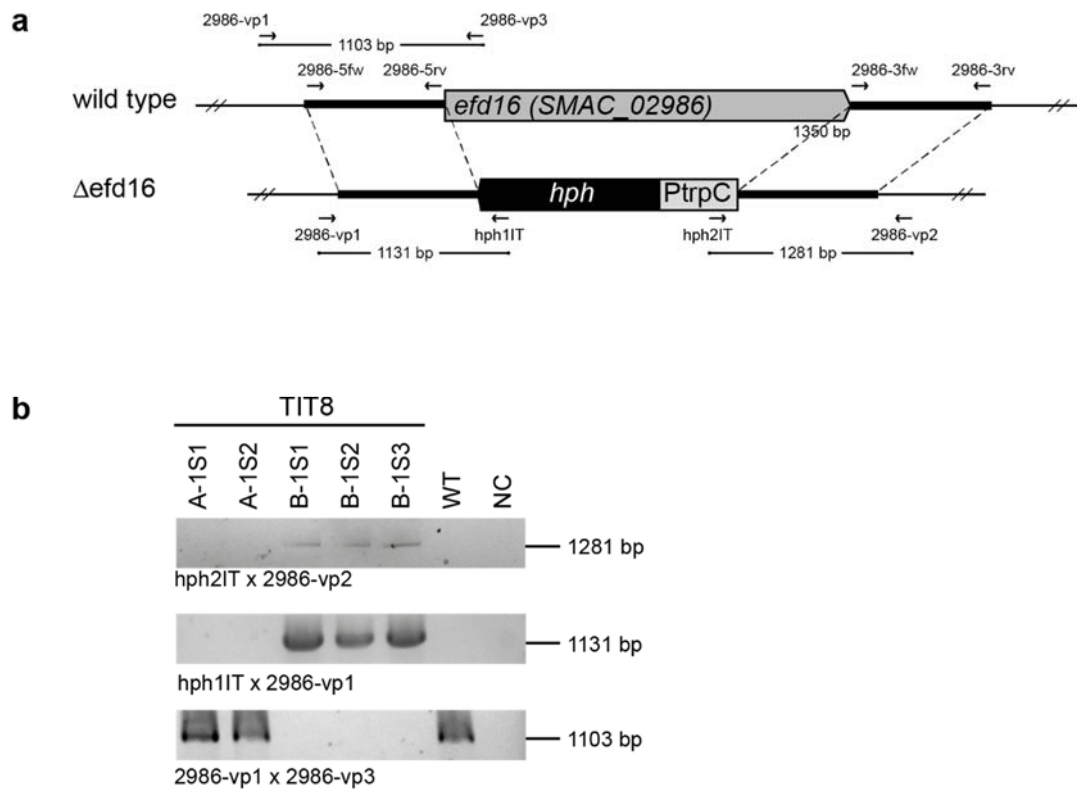

**Fig. S2** Generation of *efd16* deletion strains. **a** Schematic representation of the *efd16* (*SMAC\_02986*) genomic locus in wildtype and deletion strains ( $\Delta$ *efd16*). ORFs are displayed as grey arrows. Flanking sequences used for homologous integration of deletion constructs are shown as thick black lines. Black arrows represent primers used for PCR; size of PCR products is given on the thin black lines depicting the PCR products. Not drawn to scale. **b** PCR analysis of putative  $\Delta$ *efd16* strains with primers indicated in **a**. Note that TIT8B-1S1, TIT8B-1S2 and TIT8B-1S3 are  $\Delta$ *efd16* ascospore isolates. NK, negative control

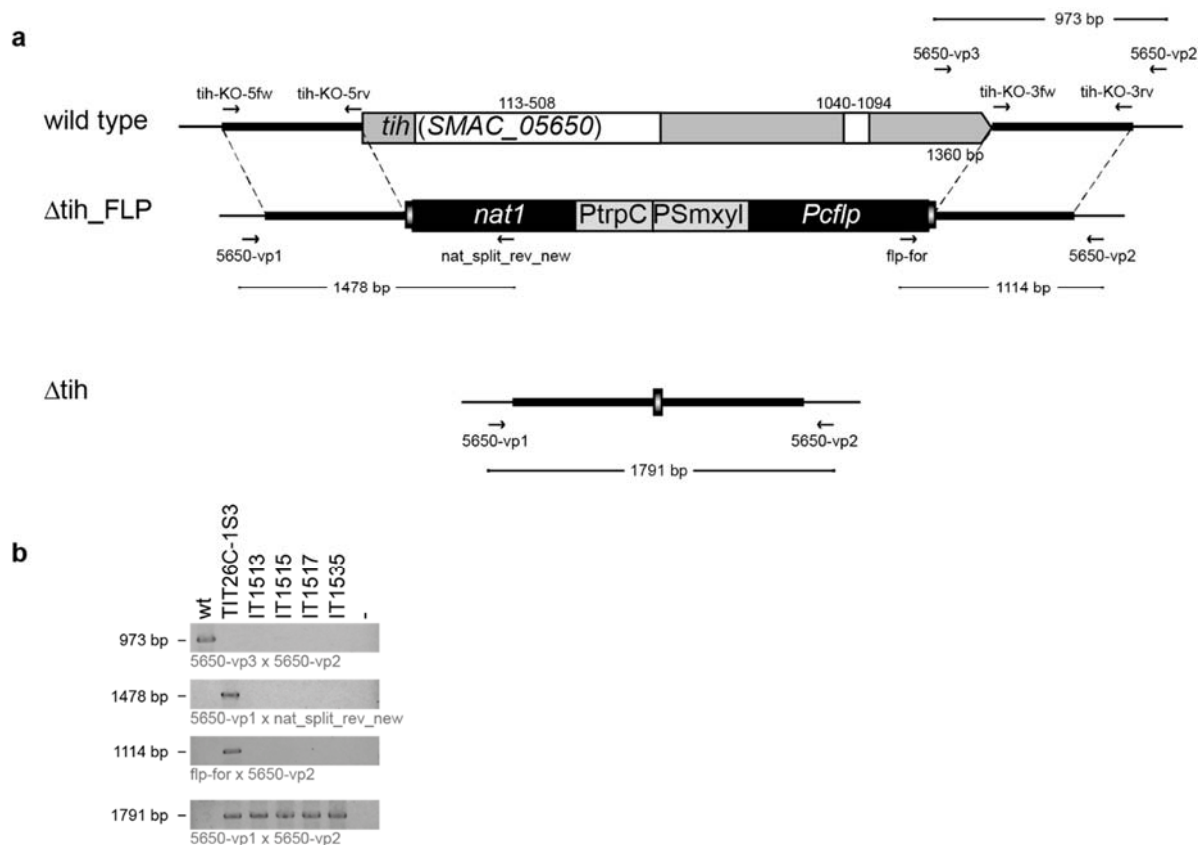

**Fig. S3** Generation of *tih* deletion strains. **a** Schematic representation of the *tih* (*SMAC\_05650*) genomic locus in wildtype and deletion strains ( $\Delta$ *tih*\_FLP) as well as marker-free  $\Delta$ *tih* after marker recycling. ORFs are displayed as grey arrows, with introns marked as white boxes. Flanking sequences used for homologous integration of deletion constructs are shown as thick black lines. Black arrows represent primers used for PCR; size of PCR products is given on the thin black lines depicting the PCR products. Not drawn to scale. **b** PCR analysis of  $\Delta$ *tih* strains with primers indicated in **a**. Note that TIT26C-1S3 is a  $\Delta$ *tih*\_FLP strain still containing the complete deletion cassette, while IT1513, IT1515, IT1517 and IT1535 are  $\Delta$ *tih* strains derived from crosses of  $\Delta$ *tih*\_FLP to wildtype and contain just one *FRT* site. -, negative control

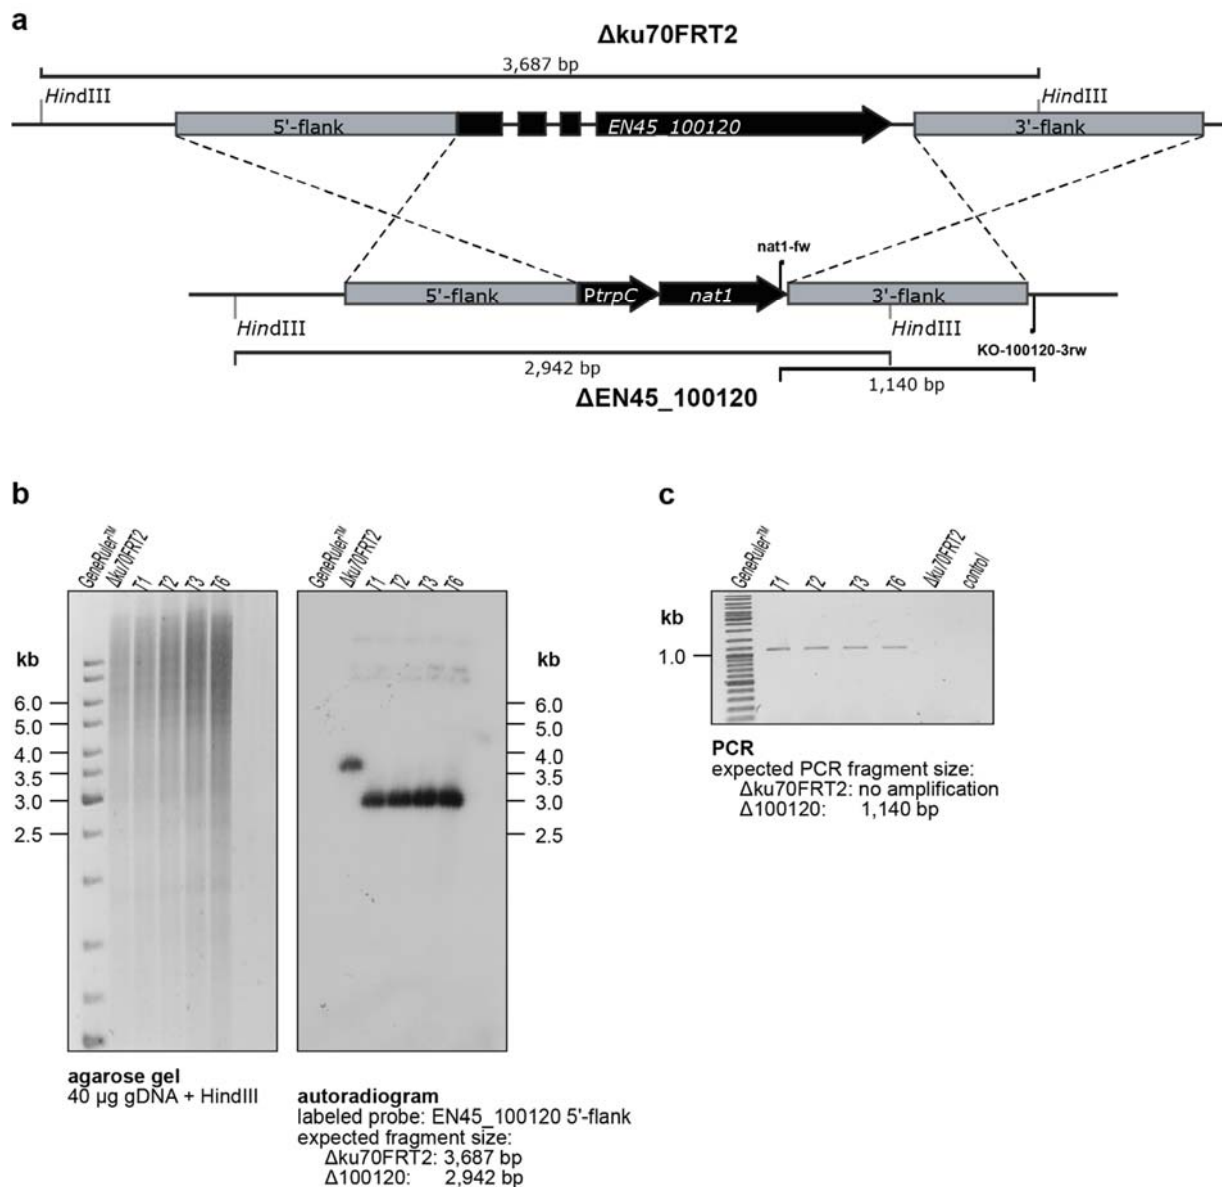

**Fig. S4** Generation of *EN45\_100120* deletion strains. **a** Schematic representation of the *EN45\_100120* genomic locus in the recipient strain  $\Delta$ ku70FRT2 and deletion strains ( $\Delta$ EN45\_100120). ORFs are displayed as black arrows. Flanking sequences used for homologous integration of deletion constructs are shown as grey bars. Sizes of PCR products and digestion fragments are given on the thin black lines depicting the DNA fragments, which are drawn to scale. Small black arrows indicate primer binding positions used for PCR. **b** Southern blot analysis of *HindIII* digested genomic DNA of the recipient and  $\Delta$ EN45\_100120 strains with a radioactively labeled probe for the *EN45\_100120* 5'-flank. **c** PCR analysis of the correct integration of the deletion cassette at the *EN45\_100120* 3'-flank

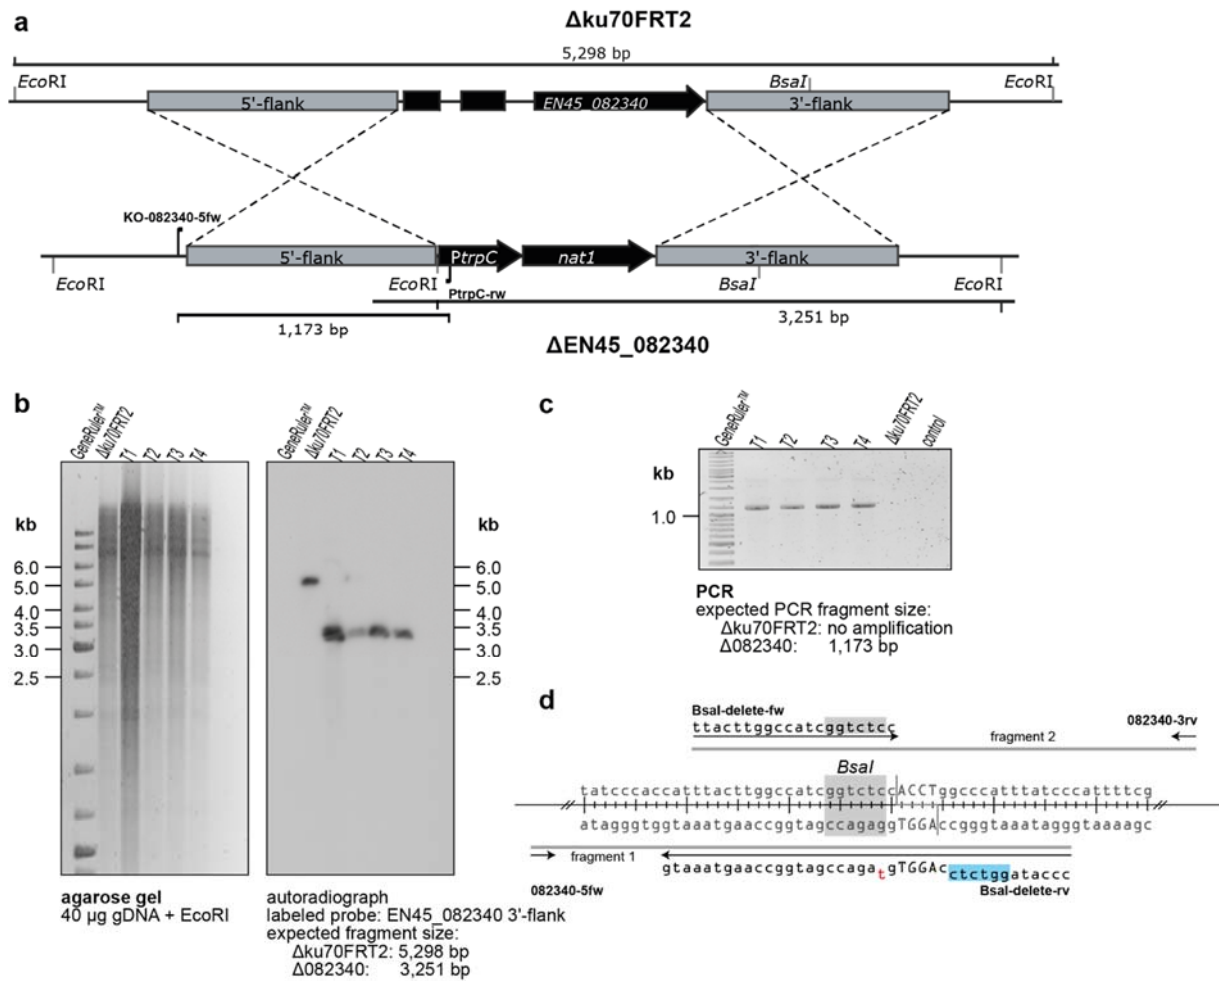

**Fig. S5** Generation of *EN45\_082340* deletion strains. **a** Schematic representation of the *EN45\_082340* genomic locus in the recipient strain  $\Delta ku70FRT2$  and deletion strains ( $\Delta EN45_082340$ ). ORFs are displayed as black arrows. Flanking sequences used for homologous integration of deletion constructs are shown as grey bars. Sizes of PCR products and digestion fragments are given on the thin black lines depicting the DNA fragments, which are drawn to scale. Small black arrows indicate primer binding positions used for PCR. **b** Southern blot analysis of *EcoRI* digested genomic DNA of the recipient and  $\Delta EN45_082340$  strains with a radioactively labeled probe for the *EN45\_082340* 3'-flank. **c** PCR analysis of the correct integration of the deletion cassette at the *EN45\_082340* 5'-flank. **d** Visualization of the primer design necessary for cloning of fragments containing internal *BsaI* sites. The sequence shows part of the 3'-flank of *EN45\_082340* with the internal *BsaI* binding site *ggcttc* (grey box, facing right and generating a 4 nt overhang (capital letters)). The short primer *BsaI*-delete-fw contains the original *BsaI* site (grey box) that will cut itself off from the PCR fragment generated with primer pair *BsaI*-delete-fw / 082340-3rv (fragment 2). Thus, this fragment will no longer contain the original internal *BsaI* binding site. The longer primer *BsaI*-delete-rv will introduce a point mutation (red) into the original *BsaI* binding site. For generation of an overhang that is ligation-compatible to the overhang in fragment 2, another *BsaI* site has to be introduced into the primer (blue box). This *BsaI* site will also cut itself off from the PCR fragment generated with primer pair 082340-5fw / *BsaI*-delete-rv (fragment 1). Both, the original *BsaI* site as well as the one added for cloning (blue box) will be absent from the ligation product after successful Golden Gate cloning.



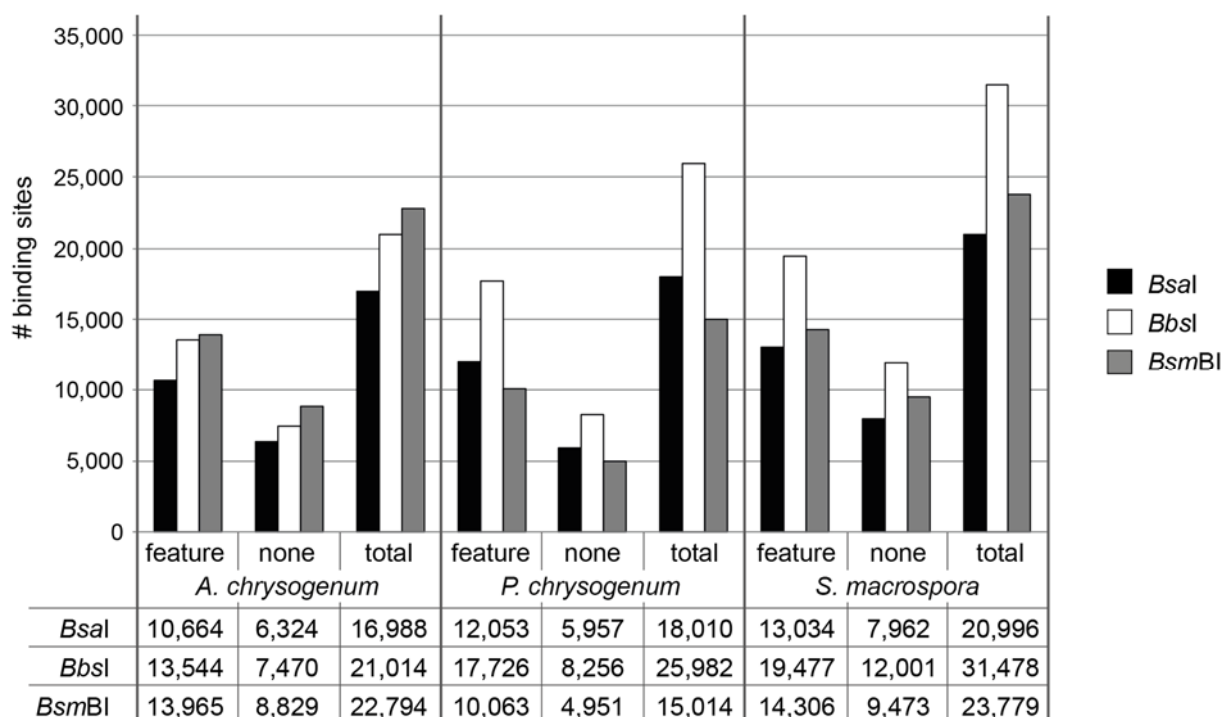

**Fig. S6** Distribution of type IIS restriction sites in fungal genomes. Binding sites for type IIS restriction endonucleases *BsaI* (black), *BbsI* (white) and *BsmBI* (grey) in annotated features (feature), regions without annotated features (none) as well as total sites for *BsaI*, *BbsI*, and *BsmBI* are given for each genome. The recognition sites were counted within the genomes of *A. chrysogenum* ATCC 11550, *P. chrysogenum* P2niaD18, and *S. macrospora* k-hell FGSC 10222 by custom-made Perl scripts (Teichert et al. 2012; Specht et al. 2014; Terfehr et al. 2014)

## References

- Becker K, Beer C, Freitag M, Kück U (2015) Genome-wide identification of target genes of a mating-type alpha-domain transcription factor reveals functions beyond sexual development. *Mol Microbiol* 96:1002-1022
- Bloemendal S, Löper D, Terfehr D, Kopke K, Kluge J, Teichert I, Kück U (2014) Tools for advanced and targeted genetic manipulation of the beta-lactam antibiotic producer *Acremonium chrysogenum*. *J Biotechnol* 169:51-62
- Christianson TW, Sikorski RS, Dante M, Shero JH, Hieter P (1992) Multifunctional yeast high-copy-number shuttle vectors. *Gene* 110:119-122
- Dreyer J, Eichhorn H, Friedlin E, Kürnsteiner H, Kück U (2007) A homologue of the *Aspergillus velvet* gene regulates both cephalosporin C biosynthesis and hyphal fragmentation in *Acremonium chrysogenum*. *Appl Environ Microbiol* 73:3412-3422
- Engl I, Nowrousian M, Kück U (2010) *Sordaria macrospora*, a model organism to study fungal cellular development. *Eur J Cell Biol* 89:864-872
- Hoff B, Kamerewerd J, Sigl C, Mitterbauer R, Zadra I, Kürnsteiner H, Kück U (2010a) Two components of a velvet-like complex control hyphal morphogenesis, conidiophore development, and penicillin biosynthesis in *Penicillium chrysogenum*. *Eukaryot Cell* 9:1236-1250
- Hoff B, Kamerewerd J, Sigl C, Zadra I, Kück U (2010b) Homologous recombination in the antibiotic producer *Penicillium chrysogenum*: strain  $\Delta$ Pcku70 shows up-regulation of genes from the HOG pathway. *Applied Microbiology and Biotechnology* 85:1081-1094
- Janus D, Hoff B, Hofmann E, Kück U (2007) An efficient fungal RNA-silencing system using the *DsRed* reporter gene. *Appl Environ Microbiol* 73:962-970
- Kopke K, Hoff B, Kück U (2010) Application of the *Saccharomyces cerevisiae* FLP/FRT recombination system in filamentous fungi for marker recycling and construction of knockout strains devoid of heterologous genes. *Appl Environ Microbiol* 76:4664-4674
- Nowrousian M, Cebula P (2005) The gene for a lectin-like protein is transcriptionally activated during sexual development, but is not essential for fruiting body formation in the filamentous fungus *Sordaria macrospora*. *BMC Microbiol* 5:64
- Nowrousian M, Teichert I, Masloff S, Kück U (2012) Whole-Genome Sequencing of *Sordaria macrospora* Mutants Identifies Developmental Genes. *G3 (Bethesda)* 2:261-270
- Pöggeler S, Kück U (2004) A WD40 repeat protein regulates fungal cell differentiation and can be replaced functionally by the mammalian homologue striatin. *Eukaryotic Cell* 3:232-240
- Pöggeler S, Kück U (2006) Highly efficient generation of signal transduction knockout mutants using a fungal strain deficient in the mammalian *ku70* ortholog. *Gene* 378:1-10
- Pöggeler S, Masloff S, Hoff B, Mayrhofer S, Kück U (2003) Versatile EGFP reporter plasmids for cellular localization of recombinant gene products in filamentous fungi. *Current Genetics* 43:54-61
- Specht T, Dahlmann TA, Zadra I, Kürnsteiner H, Kück U (2014) Complete Sequencing and Chromosome-Scale Genome Assembly of the Industrial Progenitor Strain P2niaD18 from the Penicillin Producer *Penicillium chrysogenum*. *Genome Announc* 2
- Teichert I, Wolff G, Kück U, Nowrousian M (2012) Combining laser microdissection and RNA-seq to chart the transcriptional landscape of fungal development. *BMC Genomics* 13:511
- Terfehr D, Dahlmann TA, Specht T, Zadra I, Kürnsteiner H, Kück U (2014) Genome sequence and annotation of *Acremonium chrysogenum*, producer of the  $\beta$ -lactam antibiotic cephalosporin C. *Genome Announc* 2:e00948-00914
